# Supplementary material
Source: publisher figshare collection journal article supplement (https://acs.figshare.com/ndownloader/files/11826821)
Supplement: Supplementary file 1 [file 11826821]

# Efficient Hydrogen Production by Direct Electrolysis of Waste Biomass at Intermediate Temperatures

*Takashi Hibino<sup>\*†</sup>, Kazuyo Kobayashi<sup>‡</sup>, Masaya Ito<sup>†</sup>, Qiang Ma<sup>†</sup>, Masahiro Nagao<sup>†</sup>, Mai  
Fukui<sup>‡</sup>, Shinya Teranishi<sup>‡</sup>*

<sup>\*</sup>Corresponding author email: [hibino@urban.env.nagoya-u.ac.jp](mailto:hibino@urban.env.nagoya-u.ac.jp)

<sup>†</sup>Graduate School of Environmental Studies, Nagoya University, Nagoya 464-8601, Japan

<sup>‡</sup>Soken Inc., 500-20, Minamiyama, Komenogi-cho, Nisshin, Aichi 470-0111, Japan

The Supporting Information includes additional information and figures.

Number of Pages: 6

Number of Figures: 3

## Table of Contents

### Calculation of H<sub>2</sub>, CO<sub>2</sub> and NO<sub>2</sub> formation rates

### Supporting Figures

**Figure S1.** Illustrations of electrolysis cells: a) batch type and b) flow type.

**Figure S2.** Impedance spectra for the cells at 150°C using the unheated KB anode, and the KB anodes heated at 600 and 1000 °C, and their curve fitting results.

**Figure S3.** Electrolysis characteristics of the batch cell using the bread, cypress, and rice chaff fuels at 150°C: (a)  $I$ - $V$  curves and (b) impedance spectra.

### **Calculation of H<sub>2</sub>, CO<sub>2</sub> and NO<sub>2</sub> formation rates**

The hydrogen, CO<sub>2</sub>, and NO<sub>2</sub> formation rates were calculated as follows. Based on Reactions (2) and (4), hydrogen and CO<sub>2</sub> or NO<sub>2</sub> are assumed to be formed by two- and four-electron reactions, respectively: the number of electrons (z) transferred per H<sub>2</sub> molecule in Reaction (2) is 2; z transferred per CO<sub>2</sub> or NO<sub>2</sub> molecule in Reaction (4) is 4. For electrolysis with a constant current (I), the mole number (n) of hydrogen, CO<sub>2</sub> or NO<sub>2</sub> produced per minute is estimated as:

$$n = (IA \times 60 \text{ s}) / (z \times 96485 \text{ C})$$

The current efficiency was estimated as a percentage of the actual rate to the theoretical value.

a)

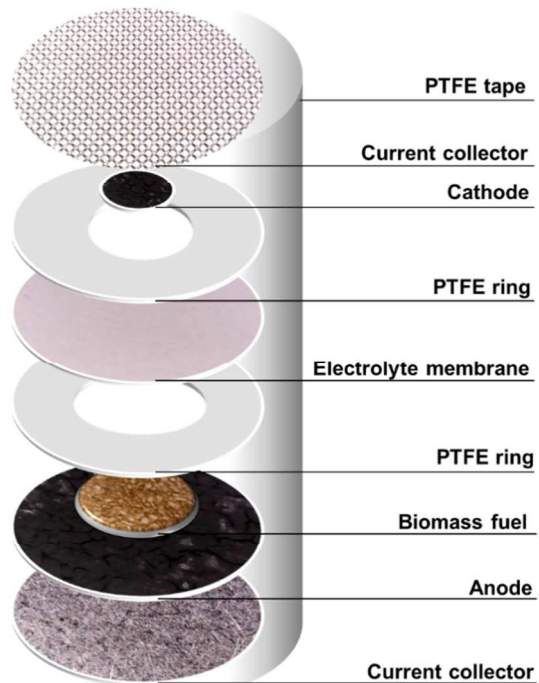

b)

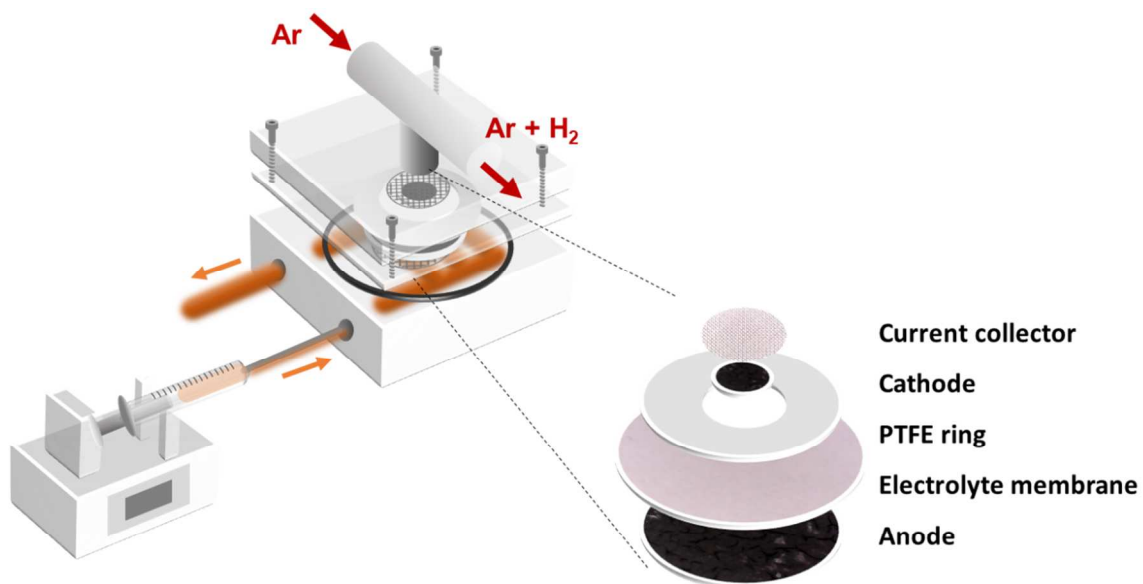

**Figure S1.** Illustrations of electrolysis cells: a) batch and b) flow type cells.

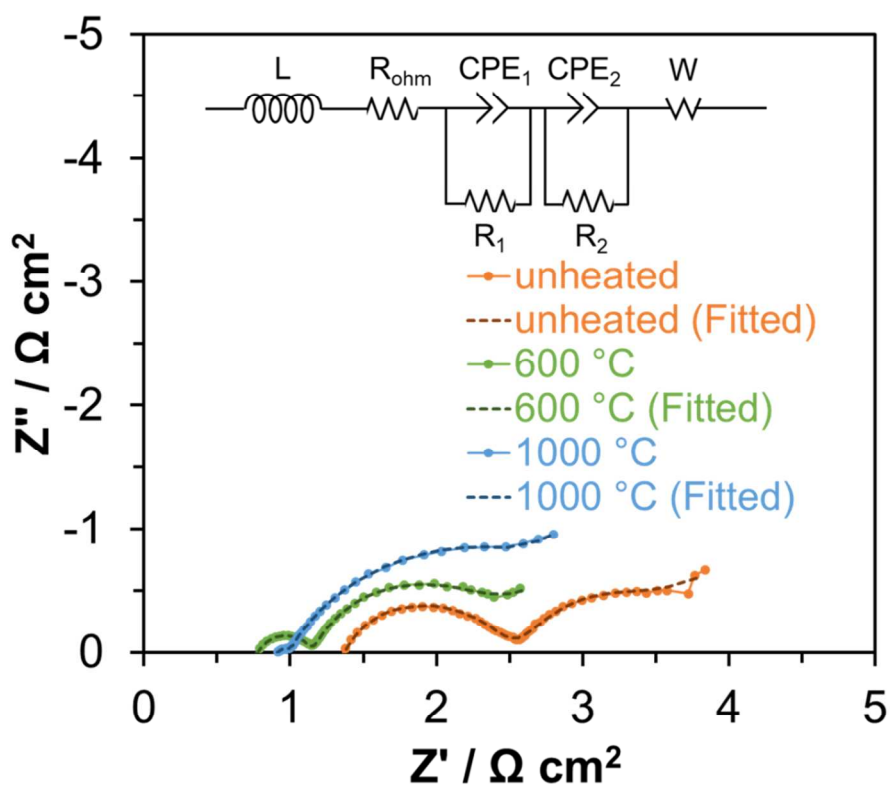

**Figure S2.** Impedance spectra for the cells at 150°C using the unheated KB anode, and the KB anodes heated at 600 and 1000 °C, and their curve fitting results.

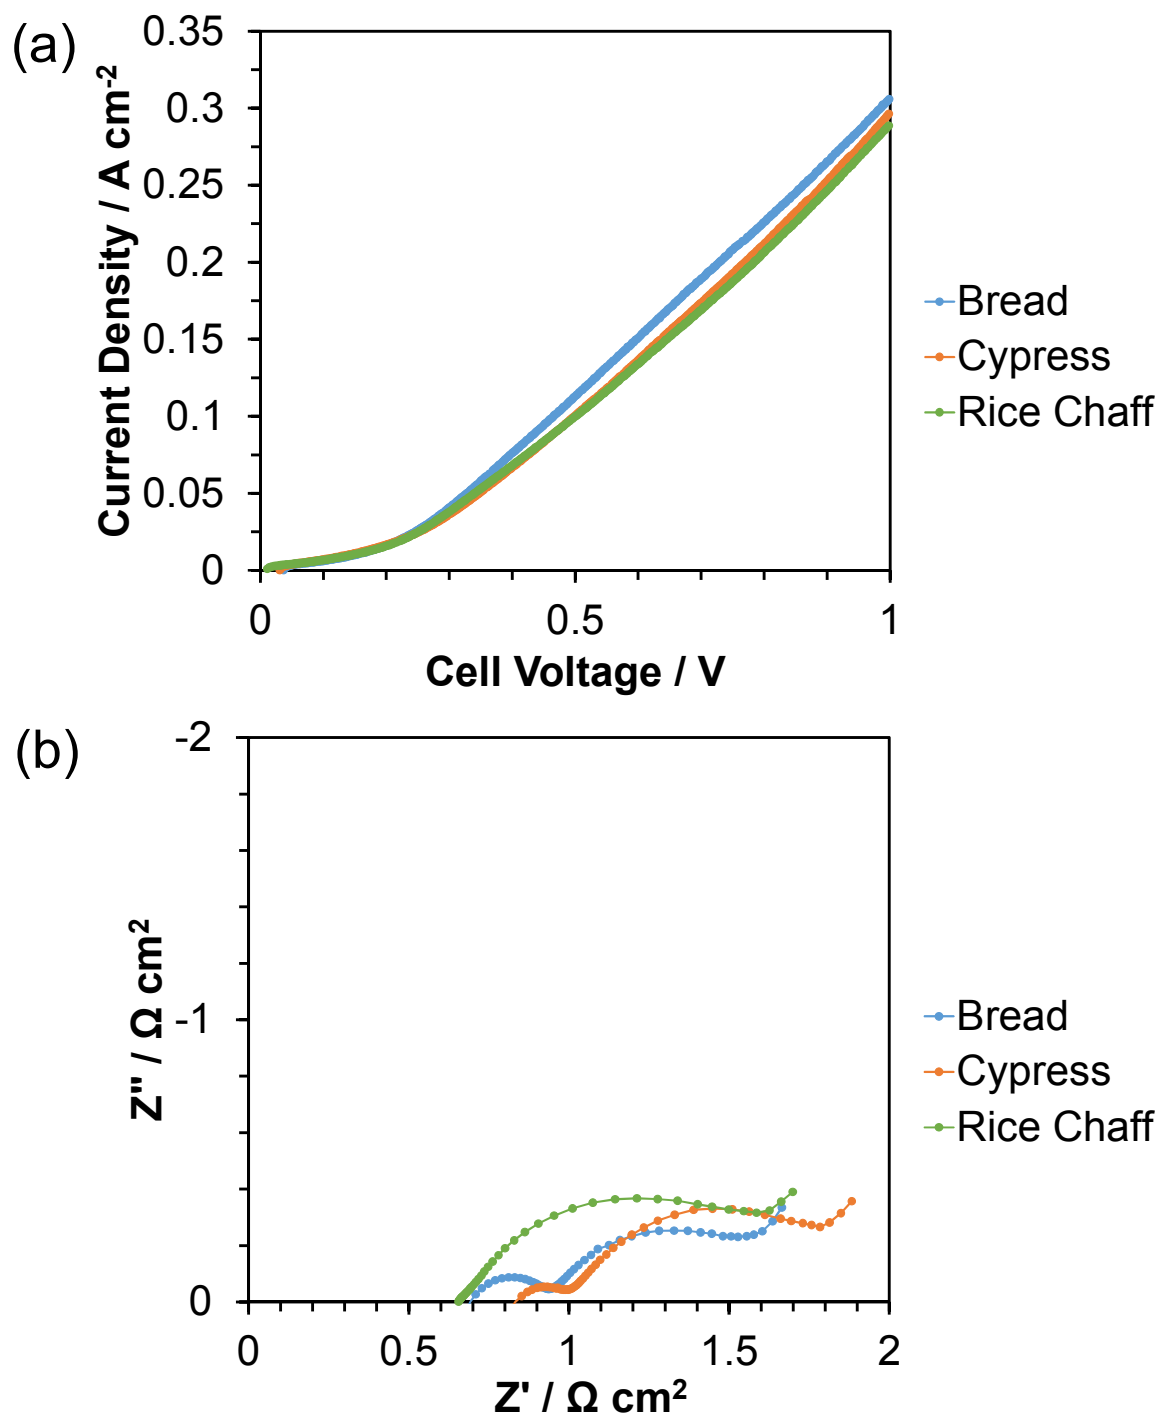

**Figure S3.** Electrolysis characteristics of the batch cell using the bread, cypress, and rice chaff fuels at 150°C: (a) *I-V* curves and (b) impedance spectra.
